# Supplementary material for: The Association between Hypertension and Insomnia: A Bidirectional Meta-Analysis of Prospective Cohort Studies
Source: Int J Hypertens. 2022 Dec 29;2022:4476905. doi: 10.1155/2022/4476905 (PMC9815923; doi:10.1155/2022/4476905)
Supplement: Supplementary Materials — Supplementary Table 1: quality assessment of included studies. Supplementary Figure 1: funnel plot with pseudo-95% confidence limits. Supplementary Figure 2: sensitivity analysis of the relationship between insomnia and hypertension. Supplementary Figure 3: funnel plot after excluding studies. Supplementary Figure 4: the correlation between follow-up time and effect size. [file 4476905.f1.zip]

Archive with 3 entries (3 files):
- Supplementary Figures (2).doc
- Supplementary Figures.pdf
- Supplementary Table1.docx
